# Supplementary material for: Copynumber: Efficient algorithms for single- and multi-track copy number segmentation
Source: PubMed Central journal article supplement (PMC3582591; doi:10.1186/1471-2164-13-591), 2012-11-04
Supplement: 1471-2164-13-591-S1.pdf [file 1471-2164-13-591-S1.pdf]

# Additional File 1

## Iterative Winsorization to handle outliers

Winsorization is a common way of handling outliers, and works by modifying extreme observations to make them conform better to the distribution of other observations. Here, we describe a Winsorization algorithm that iteratively refines the detection of outliers and the assessment of copy number changes. The input to the algorithm is a sequence of copy number values (ordered according to their genomic location), and the output is a sequence of the same length consisting of the Winsorized data.

A median filter is used to obtain an initial trend estimate. Thereafter, robustness will be less critical and we can use the (less robust) PCF method. The iteration in step 2 leads to more precise estimates, but improvements are sometimes small. Thus, from a practical point of view, we may choose  $R$  to be small. Outliers are defined as observations for which  $y_i \neq y_i^\omega$ .

### **Algorithm: Iterative Winsorization**

Input: Copy number data  $y_1, \dots, y_p$  and  $\tau > 0$ .

Output: Winsorized copy number data  $y_1^\omega, \dots, y_p^\omega$ .

1. Obtain an initial trend  $\hat{m}_{0,1}, \dots, \hat{m}_{0,p}$  by applying a median filter with a window that includes  $k$  points on each side of the probe (default is  $k = 25$ ).
2. For  $r = 1, \dots, R$ :
  - Calculate the SD of the residuals  $y_i - \hat{m}_{r-1,i}$  using the MAD estimator  $s_r = \hat{\sigma}_M$ .
  - Calculate Winsorized estimates  $y_{r,i}^\omega = \hat{m}_{r-1,i} + \Psi(y_i - \hat{m}_{r-1,i} \mid \tau s_r)$ .
  - Calculate the trend  $\hat{m}_{r,1}, \dots, \hat{m}_{r,p}$  of the data  $y_{r,1}^\omega, \dots, y_{r,p}^\omega$  using Algorithm 1.
3. Final Winsorized observations are  $y_i^\omega = y_{R,i}^\omega$  for  $i = 1, \dots, p$ .
