# Supplementary material for: Copynumber: Efficient algorithms for single- and multi-track copy number segmentation
Source: PubMed Central journal article supplement (PMC3582591; doi:10.1186/1471-2164-13-591), 2012-11-04
Supplement: 1471-2164-13-591-S3.pdf [file 1471-2164-13-591-S3.pdf]

## Additional File 3

### Comparison of PCF and CBS segmentations

The figures below compare segmentation results obtained with PCF and CBS. Winsorized copy number data for chromosome 5 from the sample MicMa-066 are shown. PCF segmentation is shown in red and CBS segmentation in blue.

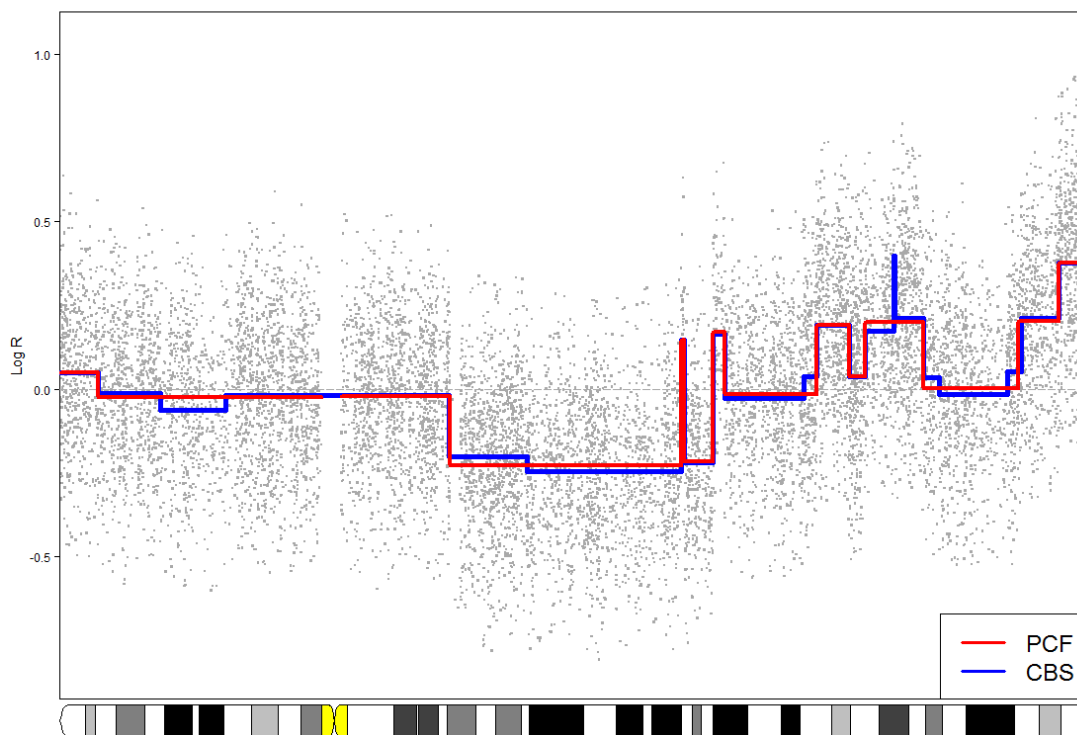

**Figure A.** PCF and CBS with default parameter values (except that min.width=5 in CBS to match the corresponding parameter kmin=5 in PCF). Overall features are the same. CBS detects some smaller local trends in the data and a narrow peak on 5q, while the default parameter setting in PCF ( $\gamma = 40$ ) emphasises such local patterns in the aberrations less.

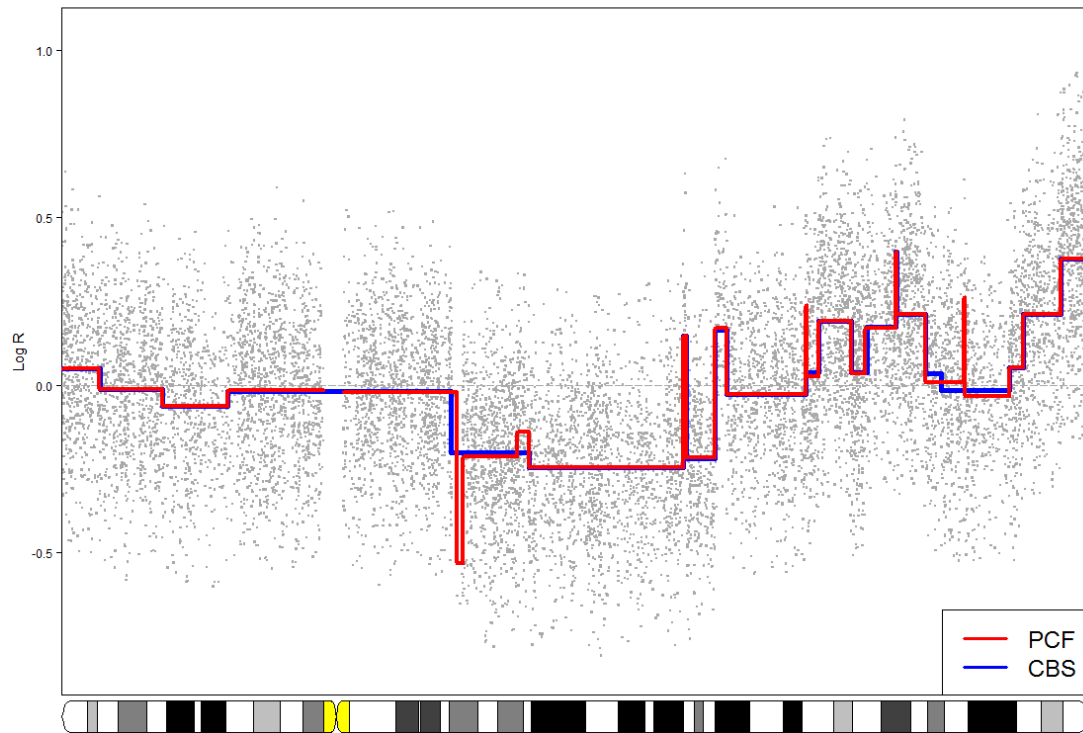

**Figure B.** PCF with  $\gamma = 12$  and CBS with the same parameters as in Figure A. PCF now finds two additional narrow peaks on 5q.

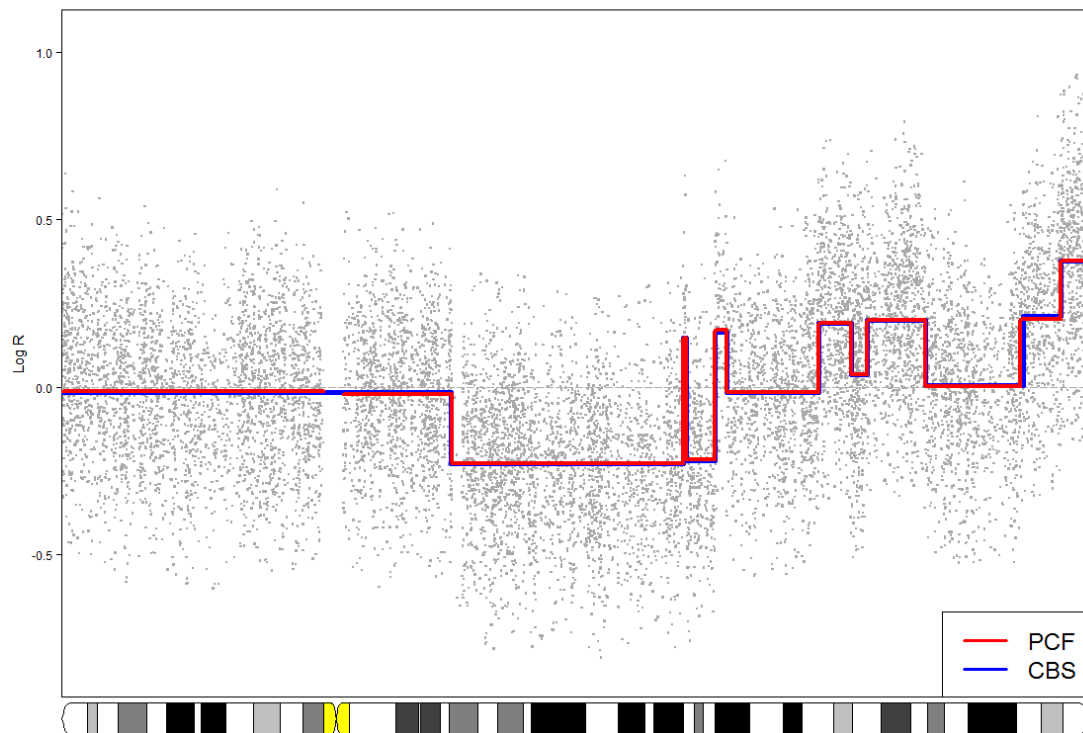

**Figure C.** PCF with  $k_{min}=5$  and  $\gamma = 60$  and CBS with  $min.width=5$ ,  $\alpha = 0.05$  (default is 0.1),  $undo.splits = \text{``sdundo''}$  (default is  $\text{``none''}$ ) and  $undo.SD = 0.5$  (default is 3). Here PCF and CBS give practically identical segmentation results.
